27 **Abstract**

28 Globoid cell leukodystrophy (Krabbe disease) is a severe demyelinating, neurodegenerative lysosomal  
29 storage disorder caused by deficiency in glycosphingolipid catabolic enzyme galactosylceramidase  
30 (GALC). Histologically, Krabbe disease is characterized by the appearance of large multinucleated  
31 globoid cells that express classical macrophage markers (both of brain-resident microglia and peripheral  
32 monocyte-derived). Globoid cells reside near areas of degeneration; however, their functional  
33 significance in disease progression remains unclear. In the current study, we differentiated microglia-  
34 like cells from iPSCs from a donor with infantile Krabbe disease and compared them to microglia  
35 generated from two healthy controls and two donors with the lysosomal storage disorder  
36 metachromatic leukodystrophy (MLD), which is genetically distinct from Krabbe disease but presents  
37 similarly in terms of severity of demyelination and neurodegeneration. We report the novel finding of  
38 prominent formation of giant multinucleated globoid cells from the microglia derived from the Krabbe  
39 donor, but not from healthy control or MLD donors. The Krabbe microglia displayed reduced IL-6  
40 protein expression upon stimulation with lipopolysaccharide, and the multinucleated globoid cells  
41 themselves appeared deficient in phagocytosis of both disease-relevant myelin debris and *E. coli*,  
42 together hinting at an impairment of normal function. The formation of the globoid cells could be  
43 attenuated by fully replacing the medium following passaging, suggesting that yet-to-be determined  
44 secreted factors are influencing cell fusion in our culture system. While preliminary, our results imply  
45 that globoid cells may be detrimental in Krabbe disease by hindering the normal function of brain-  
46 residing macrophages.

47

48

49

50

51

52

53

54

55

56

57

58

59 Keywords: phagocytosis, iPSC, microglia, metachromatic leukodystrophy, globoid cell leukodystrophy

60

## 61 Introduction

62 Sphingolipids, including glycosphingolipids, comprise a complex set of sphingoid base-containing lipids  
63 that have diverse biological roles (1). Glycosphingolipids are highly expressed in the brain and are major  
64 components of neural membranes, contributing to cellular structure, direct cell-to-cell interaction, and  
65 intra- and inter-cellular signaling, among other functions including those continuing to be discovered (2-  
66 4). Dysregulation of glycosphingolipid metabolism caused by mutations in genes encoding lysosomal  
67 enzymes can lead to accumulation of undegraded substrate and subsequent neuropathology, in severe  
68 cases manifesting within the first years of life (5, 6). While many of the genetic defects that result in  
69 lysosomal storage disorders are known, the downstream cellular cascades that influence  
70 neurodegeneration remain to be fully elucidated.

71 Globoid cell leukodystrophy (Krabbe disease), a rare (~1:100,000 births) lysosomal storage disorder  
72 hallmarked by the appearance of multinucleated globoid cells in the brain, is characterized by  
73 progressive neurodegeneration and demyelination of the central, and to a lesser extent, peripheral  
74 nervous systems (7, 8). The disease is classified by age of onset with the most severe infantile-onset  
75 form accounting for 85-90% of cases, which typically manifests prior to 12 months of age and has an  
76 average age of death around 24 months (9). Krabbe disease is caused by deficiency of the enzyme  
77 galactosylceramidase (GALC) arising from recessive, deleterious mutations in its gene, *GALC* (10-12).  
78 GALC deficiency results in the inability to degrade galactosylceramide (Figure 1), a glycosphingolipid  
79 highly expressed in myelinating cells of the nervous system (13), leading to a paradoxical decrease in  
80 galactosylceramide in postmortem Krabbe nervous system tissue but an increase in its toxic metabolite  
81 galactosylsphingosine (psychosine) compared to healthy controls (14). This is believed to be due to the  
82 protective effect of GALC hydrolysis of psychosine under normal conditions (14). These findings, in  
83 tandem with results highlighting that psychosine exposure has effects on cells of the brain (15) including  
84 oligodendrocytes (16, 17), neurons (18, 19), astrocytes (20, 21), and microglia (22, 23), has led to the  
85 acceptance of the “psychosine hypothesis,” which postulates that psychosine is the main driver of  
86 disease progression (14, 24).

87 The namesake multinucleated globoid cells that form in the brains of Krabbe patients appear around  
88 areas of demyelination (25, 26). Multinucleated globoid cells express classical macrophage markers  
89 including IBA1 and CD11b, and in the disease state arise from cellular fusion primarily of brain-resident  
90 microglia but also from infiltrating peripheral macrophages (23, 27). Their relevance in Krabbe disease  
91 pathology remains to be fully elucidated. Globoid cell occurrence is inversely correlated with Krabbe  
92 patient longevity (26), suggesting that they are either detrimental to disease progression and/or form in  
93 response to detrimental drivers of disease, for example psychosine (22, 23). Since giant multinucleated  
94 cells form *in vitro* from exogenous stimulation with inflammatory factors and *in vivo* from inflammation  
95 arising from bioimplants and prosthetics (28-30), it has been suggested that the neuroinflammation  
96 caused by demyelination results in the formation of globoid cells in Krabbe disease (31). However,  
97 globoid cells are observed in a murine model of Krabbe disease in the absence of demyelination and  
98 neuroinflammation (32). These conflicting results highlight the need for more information to fully  
99 address the role of globoid cells in the pathogenesis of Krabbe disease.

100 Metachromatic leukodystrophy (MLD) is a rare (~1:60,000 births) lysosomal storage disorder that arises  
101 mainly due to deficiency in the lysosomal enzyme arylsulfatase A, caused by deleterious recessive  
102 mutations in its gene, *ARSA* (33, 34). Arylsulfatase A is adjacent to GALC in the galactosylceramide

103 metabolic pathway and catabolizes sulfatide into galactosylceramide (35) (Figure 1). Deficiency in the  
104 enzymatic activity of arylsulfatase A leads to accumulation and lysosomal storage of its substrate  
105 sulfatide and lyso-sulfatide, that subsequently result in cellular dysfunction (36, 37). The clinical  
106 manifestation of MLD is similar to Krabbe disease, including infantile demyelination and  
107 neurodegeneration in the most severe form, which is a reason why Krabbe disease and MLD are  
108 considered the two classic genetic leukodystrophies (7, 10). Aberrant microglial function is common  
109 between the two diseases (31, 38, 39), and hematopoietic stem cell replacement therapy is somewhat  
110 therapeutically efficacious in the course of both diseases (40-42), suggesting that, at least in part, cells of  
111 this lineage are important to disease progression. However, histologically Krabbe disease is distinct  
112 from MLD due to the prominent formation of multinucleated globoid cells in the brain (43). This implies  
113 that, while both diseases have common microglial abnormalities, factors distinct to the pathology of  
114 Krabbe disease result in a different microglial phenotype than in MLD.

115 A human cell model may provide valuable insights into the role of microglia in Krabbe disease and could  
116 be useful in identifying differences between Krabbe and MLD microglia that result in the Krabbe-specific  
117 globoid cells. Pluripotent stem cells generated from human fibroblasts (44) have the capacity to  
118 differentiate into many lineages of the central nervous system (45). Recent protocols describe the  
119 generation of phagocytically-competent iPSC-derived microglia-like cells that are similar to fetal human  
120 microglia at the transcriptomic level (46-50), suggesting that human iPSCs provide a tool to explore  
121 microglial pathology in Krabbe disease. Therefore, we generated microglia-like cells from a donor with  
122 Krabbe disease and compared them to cells generated from two healthy controls and two donors with  
123 MLD. Unexpectedly, but in line with disease characteristics, we identified robust formation of  
124 multinucleated globoid cells in microglia cultures derived from the Krabbe donor, recapitulating the  
125 hallmark of the disease. Globoid cell formation was observed in the absence of exogenous psychosine  
126 administration, which has been used in prior studies to induce multinucleated cells (22, 23). We used  
127 this phenotype to qualitatively probe the consequences of cell fusion in our novel cell model utilizing  
128 assays relevant to microglial function. Our findings are in support of prior studies suggesting an  
129 important role of microglia in the pathogenesis of Krabbe disease (for review, see (31)).

130

## 131 **Materials and Methods**

### 132 *iPSC generation*

133 Fibroblasts from two healthy donors (Control 1: GM05659, 1 year old male; Control 2: HUCMF05, male  
134 cord blood), two donors with infantile onset MLD (MLD1: GM00197, 4 year old male; MLD2: GM00905,  
135 3 year old female), and one donor with infantile onset Krabbe disease (GM06806, 2 year old female)  
136 were obtained from the Coriell Institute for Medical Research, with the exception of Control 2, which  
137 was obtained from Icelltis. Reprogramming to pluripotency was carried out using the CytoTune 2.0  
138 sendai virus kit (Thermo-Fisher Scientific) to overexpress four transcription factors (OCT4, SOX2, KLF4,  
139 and c-Myc) according to the manufacturer's protocol. Individual iPSC colonies derived from each donor  
140 were manually selected and clonally expanded on Matrigel (Corning) coated plates in complete mTeSR1  
141 medium (StemCell Technologies). Cultures were monitored and areas of spontaneous differentiation  
142 were removed. Cells were passaged when they reached ~80-90% confluence using ReLeSR (StemCell  
143 Technologies). Induction of pluripotency was validated by the expression of OCT4 and NANOG via  
144 immunofluorescence (data not shown). G-banded karyotyping was carried out by the WiCell Institute

145 (Madison, WI). All iPSC lines displayed a normal karyotype except for MLD2, which was found to have a  
146 duplication of the long arm of chromosome 14 in 7 of 20 cells examined. The line was included in the  
147 current study due to its appropriate morphology, expression of pluripotent markers, and its ability to  
148 differentiate robustly and successfully.

#### 149 *Differentiation of microglia-like cells*

150 Microglia-like cells were differentiated utilizing a serum-free protocol containing aspects of three  
151 published protocols (49-51). In sum, this protocol is designed for the continuous harvesting of primitive  
152 macrophage precursors that are shed from embryoid bodies over ~6-8 months for terminal  
153 differentiation into microglia using defined factors. First, embryoid bodies (EBs) were generated from  
154 confluent iPSC cultures by dissociating them to single cells and seeding them at a density of  $\sim 4 \times 10^6$  cells  
155 per well of Aggrewell 800 6-well plates (StemCell Technologies), equating to  $\sim 2200$  cells per EB. Cells  
156 were seeded and cultured in EB medium consisting of complete mTeSR1 supplemented with 10  $\mu$ M  
157 Y27632 (StemCell Technologies), 50 ng/mL BMP-4, 20 ng/mL stem cell factor (SCF), and 50 ng/mL VEGF-  
158 121 (all from Peprtech). EB medium was replaced every other day for 7 days. EBs were collected from  
159 the Aggrewell plates, centrifuged and washed in X-VIVO 15 medium (Lonza Biosciences) and seeded into  
160 tissue culture treated vessels at a density of 16 EBs per well of a 6-well plate, 75 EBs per T75 flask, or  
161 150 EBs per T150 flask. Cells were seeded and cultured in hematopoietic cell medium consisting of X-  
162 VIVO 15 medium (with gentamicin and phenol red) supplemented with 2mM Glutamax (Gibco), 1x  
163 penicillin/streptomycin (Gibco), 55  $\mu$ M  $\beta$ -mercaptoethanol (Gibco), 100 ng/mL M-CSF (Peprtech), and  
164 25 ng/mL IL-3 (Cell Guidance Systems). Following seeding of EBs, cultures were not agitated for 7 days  
165 to allow for adherence. Lines with poor adherence efficiency could be seeded at higher densities for  
166 better downstream yield (we have used up to 50 EBs in a well of a 6-well plate). An equal volume of  
167 fresh hematopoietic cell medium was added to the cultures on days 7 and 14 following seeding, with no  
168 medium being removed. Thereafter,  $\sim 75\%$  of the medium was collected and replaced with fresh  
169 hematopoietic cell medium every 7 days.

170 Primitive macrophage precursors (PMPs) could be observed in suspension shedding from the adhered  
171 EBs for up to ~6-8 months in culture. The PMPs were harvested during the medium change by collecting  
172 supernatant through a 40  $\mu$ m filter to remove unwanted debris. Cells were centrifuged and  
173 resuspended in microglia medium consisting of Advanced DMEM/F12 (Gibco) supplemented with 2mM  
174 Glutamax, 1x penicillin/streptomycin, 1x N2 supplement (Gibco), 100 ng/mL IL-34, and 10ng/mL GM-CSF  
175 (both from Peprtech). 2.5 million or 7.5 million cells were seeded into tissue culture treated 10 CM to  
176 15 CM plates, respectively. Fresh microglia medium was fully replaced every 2-3 days for 7 days.  
177 Following terminal differentiation microglia were removed from the plate via a 10-minute incubation  
178 with Accumax (Millipore) and lifted with a cell scraper. Cells were collected, centrifuged, and  
179 resuspended in complete microglia medium for counting. The passaged microglia were directly seeded  
180 in complete microglia medium into assay plates. In one experiment, 1 nM or 10 nM rhGALC protein  
181 (R&D Systems) was added to the microglia medium at the time of seeding into the assay plate.

#### 182 *Live cell imaging with Calcein Green AM*

183 Differentiated microglia were seeded into tissue culture treated 96-well high content imaging plates  
184 (CellCarrier Ultra, Perkin Elmer) at a density of 60,000 cells/well. 96 hours after seeding medium was  
185 aspirated and replaced with PBS containing calcium and magnesium supplemented with Hoechst 33342  
186 (1:1000, Thermo-Fisher Scientific) and Calcein Green AM (50  $\mu$ g vial resuspended in 50  $\mu$ L DMSO,

187 1:1000, Thermo-Fisher Scientific) to identify live cells. Cells were incubated with dye for 10 minutes at  
188 37°C and then directly imaged using a 5x objective on a Perkin Elmer Opera Phenix high content  
189 microscope.

#### 190 *Phagocytosis of pHrodo conjugated substrates*

191 Phagocytosis of pHrodo-conjugated *E. coli* and myelin debris was performed utilizing published methods  
192 (52, 53). pHrodo Red-labeled *E. coli* (Thermo Fisher Scientific) was resuspended in PBS to 1 mg/mL,  
193 vortexed vigorously, sonicated for 5 minutes, and used fresh or stored at 4°C until use, according to the  
194 manufacturer's instructions. Myelin debris was separated via Percoll (Sigma Aldrich) gradient, pelleted,  
195 and washed three times with PBS. Protein concentration was determined via BCA and 4 mg/mL aliquots  
196 in PBS were stored at -80°C until use. Labeling of myelin debris with pHrodo Red SE (Thermo-Fisher  
197 Scientific) was carried out according to the manufacturer's instructions. First, 7.5% (0.9M) sodium  
198 bicarbonate buffer was added to ~800 µg of myelin debris in PBS to a final concentration of 100 mM.  
199 pHrodo Red SE was resuspended to 10 mM in DMSO and 1.5 µL was added to the 800 µg myelin solution  
200 and incubated at room temperature for 45 minutes. Conjugated myelin was pelleted via centrifugation  
201 at 12,000 RPM for 5 min and washed three times to remove unbound pHrodo dye. Supernatant from  
202 the final wash was collected and stored at -80°C and used as a loading control. pHrodo-conjugated  
203 myelin was resuspended to 500 µg/mL in PBS and stored at -80°C until use.

204 Healthy control and Krabbe microglia were passaged into 96 well high content imaging plates at a  
205 density of 60,000 cells/well and maintained in culture for 96 hours to allow for the formation of  
206 multinucleated cells prior to the phagocytosis assay. pHrodo-conjugated substrate was thawed and  
207 resuspended to 20 µg/mL in complete microglia medium described above. Medium was aspirated from  
208 the microglia and replaced with the medium supplemented with substrate and incubated at 37°C for 2  
209 hours. Prior to live cell imaging medium was aspirated and replaced with Hoechst (1:1000)-containing  
210 PBS (+calcium and magnesium) and cells were incubated for 5 minutes at 37°C. Images were acquired  
211 using a 20x objective on a Perkin Elmer Opera Phenix microscope.

#### 212 *Measurement of IL-6 expression*

213 Microglia from two healthy controls, 2 MLD donors, and the Krabbe donor were differentiated for 7 days  
214 and passaged into a 96-well plate at 60,000 cells/well. Cells were cultured for 96 hours and then  
215 stimulated with medium (mock condition) or 50 ng/mL lipopolysaccharide (LPS, purchased from Sigma-  
216 Aldrich) by spiking in 500 ng/mL LPS at a 1:10 ratio (i.e. 20 µL of 500 ng/mL LPS into the 200 µL culture  
217 medium). Cells were incubated with LPS for 24 hours. Supernatant was collected, diluted 1:5 (mock  
218 condition) or 1:20 (LPS condition) and analyzed on a PHERAstar plate reader (BMG Labtech) using  
219 alphaLISA technology (Perkin Elmer) per the manufacturer's instructions. Concentration of IL-6 was  
220 calculated based on the standard curve provided in the alphaLISA kit. Following collection of the  
221 supernatant, cells were live imaged with Calcein Green AM and Hoechst, as described above, and the  
222 entire well was imaged at 5x magnification. The number of viable nuclei was quantified by counting the  
223 number of Calcein positive nuclei using Harmony software (Perkin Elmer). Concentration of IL-6 protein  
224 was then normalized to the total viable nuclei count to generate concentration on a per-viable nuclei  
225 basis, which allowed for comparison between wells and donors and controlled for globoid cell formation  
226 and discrepancies in seeding density. 8 wells total of a 96-well plate were measured per donor subject,  
227 4 wells for baseline, and 4 LPS-stimulated. One-way ANOVA with post-hoc Dunnett's multiple



228 comparison test was used for statistical analysis in GraphPad Prism Version 8 for Windows (GraphPad  
229 Software, [www.graphpad.com](http://www.graphpad.com)).

### 230 *Immunocytochemistry*

231 Cells were fixed in 4% paraformaldehyde for 15 minutes at room temperature, washed twice with PBS,  
232 and blocked and permeabilized in 10% normal donkey serum (Abcam) supplemented with 0.3% triton X-  
233 100 (Sigma-Aldrich) for 15 minutes at room temperature. Blocking solution was aspirated and cells were  
234 washed with PBS. Primary antibodies were added in antibody dilution buffer consisting of 2% normal  
235 donkey serum, 1% bovine serum albumin (Sigma-Aldrich) and 0.1% TWEEN-20 (Sigma-Aldrich) in PBS.  
236 The following primary antibodies were used: mouse anti-OCT4 (1:1,000; Millipore MAB4419), goat anti-  
237 IBA1 (1:500; Abcam Ab5076), and rabbit anti-CD11b (1:500, Abcam Ab133357). Primary antibodies  
238 were incubated overnight at 4°C, following which cells were washed four times in PBS and donkey anti-  
239 mouse 488, donkey anti-rabbit 488, or donkey anti-goat 568 Alexa Fluor-conjugated secondary  
240 antibodies (diluted 1:1,000 in antibody dilution buffer; Thermo-Fisher Scientific) were applied at room  
241 temperature for 2 hours. Cells were washed four times with PBS and CellMask Deep Red (1:10,000;  
242 Thermo-Fisher Scientific) and Hoechst 33342 (1:10,000; Thermo-Fisher Scientific) diluted in PBS were  
243 applied to the cells for 10 minutes at room temperature, following which cells were washed two times  
244 with PBS and imaged on a Perkin Elmer Opera Phenix microscope.

245

## 246 **Results**

### 247 *Formation of large multinucleated globoid cells in Krabbe microglia-like cells*

248 Microglia-like cells were differentiated from iPSCs derived from 2 healthy controls, 2 donors with MLD,  
249 and 1 donor with Krabbe disease (Figure 2A-E). Following 7 days in microglia differentiation medium,  
250 cells were enzymatically and mechanically passaged into microwell assay plates. We used the viability  
251 probe Calcein Green AM to examine the gross morphology of the cultures. 4 days after passage we  
252 noted sporadic cell fusion in healthy control and MLD-derived cultures (Figure 2F, white arrows,  
253 Supplementary Figure 1). The formation of fused, multinucleated globoid cells was prominent and  
254 robust in cultures derived from the Krabbe donor, which appeared to be larger and more pronounced  
255 than the sparse multinucleated cells present in healthy control and MLD-derived cultures (Figure 2F, red  
256 arrow, Supplementary Figure 1).

### 257 *Impaired microglial function observed in Krabbe cells*

258 We examined IL-6 production following LPS stimulation and phagocytosis of fluorophore-conjugated  
259 substrates to assess the functional significance of globoid cell formation. Microglia were stimulated  
260 with 50nM LPS following globoid cell-induction by passaging, which resulted in robust expression of IL-6  
261 protein in all cultures. There was significantly more IL-6 protein (Figure 3) measured in the supernatant  
262 of control and MLD cultures compared to the Krabbe cells (ANOVA:  $F(4, 15) = 6.96$ ,  $p = 0.002$ ; Dunnett's  
263 multiple comparisons post-hoc test: Krabbe vs. Control 1;  $p = 0.002$ , Krabbe vs Control 2;  $p = 0.026$ ,  
264 Krabbe vs. MLD1;  $P = 0.001$ , Krabbe vs MLD2;  $p = 0.009$ ).

265 Microglia from one healthy control and the Krabbe donor were passaged into assay plates to induce  
266 globoid cell formation. Cultures were then incubated with pHrodo-conjugated substrates, either mouse

267 myelin debris or *E. coli*. The pHrodo probe is only fluorescent when internalized and localized to an  
268 acidic environment. Following a 2-hour incubation with substrate, we observed a lack of fluorescent  
269 signal of conjugated myelin (Figure 4A; Supplementary figure 2) and *E. coli* (Figure 4B) in multinucleated  
270 globoid cells. Importantly, non-multinucleated microglia derived from the Krabbe donor displayed  
271 functional phagocytosis of these substrates, suggesting that they are phagocytically competent when  
272 not fused.

### 273 *Globoid cell formation can be attenuated by medium replacement*

274 Extracellular matrix proteins modulate the formation of globoid cells and alter microglial functions in  
275 models of Krabbe disease (22, 23), and culture medium supplemented with cytokines including IL-4 or  
276 IL-13 induces the formation of giant multinucleated cells in bone marrow derived macrophages (28, 29,  
277 54). With respect to these published findings, we explored if factors secreted into the medium following  
278 passaging might be influencing cell fusion. As a pilot experiment, we induced globoid cell formation by  
279 passaging Krabbe microglia and fully replaced the medium at 2-, 4-, and 24-hours post-plating. Cells  
280 were left in culture until the 96-hour time point was reached. In comparison to a condition with no  
281 medium change, we noted a visible reduction in globoid cell formation in wells where the medium had  
282 been replaced at 2- and 4-hours post-plating. The attenuation of globoid cell formation was not  
283 noticeable in wells where the medium had been replaced 24-hours after seeding (Figure 5).

284

## 285 **Discussion**

286 iPSCs can be differentiated into disease-relevant cell types that may facilitate the identification of  
287 phenotypes related to disease pathogenesis. In the current study, we capitalized on published methods  
288 (49-51) to differentiate IBA1+ microglia-like cells from a donor with Krabbe disease and compared them  
289 to cells generated from two healthy donors and two donors with MLD. To our knowledge, this proof-of-  
290 concept report is the first to demonstrate the ability of iPSC-derived microglia to be generated from  
291 patients with Krabbe disease and MLD, suggesting that researchers can take advantage of this workflow  
292 to probe the disease biology of this cell type *in vitro*.

293 We opted to follow the differentiation protocols established by Brownjohn et al., 2018 and Haenseler et  
294 al., 2017 because of the detailed characterization of the cells in these publications. Using these culture  
295 methods, iPSCs generate nearly pure cultures of microglia-like cells that express classical markers IBA1,  
296 CD45, and TREM2, are phagocytically competent, and upregulate cytokines following LPS stimulation  
297 (49, 50). Transcriptomic profiling identified that microglia differentiated using these methods clustered  
298 with primary human microglia cultured *in vitro*, although it is noteworthy that the iPSC microglia  
299 clustered distinctly from profiles of human microglia and macrophages *ex vivo* (49). However, Haenseler  
300 et al., 2017 found that co-culture of iPSC microglia with iPSC-derived mixed neuron cultures lead to  
301 transcriptomic clustering with fetal human microglia (50), perhaps suggesting that cell signaling factors  
302 or direct cell interactions are necessary and sufficient to push iPSC-derived microglia to a more mature  
303 state that resembles the normal human developmental state. Indeed, Takata et al. 2017 also found  
304 that co-culture of iPSC-derived macrophage precursors with neurons was necessary to drive the cells to  
305 an embryonic microglia-like state (55). Taken together, these results suggest that the methods used in  
306 our current study to generate iPSC-derived microglia are sufficient to probe the biology of Krabbe  
307 disease and other lysosomal storage disorders characterized by microglia involvement, but results



308 should be considered with respect to the overall immaturity of the cells and the lack of co-culturing with  
309 neurons.

310 Robust formation of large multinucleated globoid cells was observed in microglia generated from the  
311 donor with Krabbe disease, recapitulating a histological hallmark of the disease. The formation of these  
312 cells was more prominent in the Krabbe-derived cultures than either healthy control-derived or MLD  
313 patient-derived cultures. Using two healthy donors and two donors with MLD, a genetically distinct  
314 demyelinating disease that manifests similarly to Krabbe disease but lacks the formation of globoid cells  
315 (7), allowed us to be more confident in the phenotype identified in the Krabbe line. We probed the  
316 functional significance of globoid cell formation in the Krabbe microglia with pHrodo-labeled myelin  
317 debris or *E. coli* to visually identify phagocytically-competent cells. Strikingly, the globoid cells were  
318 deficient in phagocytosis, indicated by the lack of fluorescence signal in the multinucleated cells. This  
319 finding best complements recent evidence in murine models that heterozygous mutations in the *GALC*  
320 gene resulted in microglial impairments of myelin clearance *in vivo* and *in vitro* (52). Furthermore,  
321 macrophage depletion in the mouse model of Krabbe disease (the *twitcher* mouse) resulted in increased  
322 myelin debris and exacerbated disease progression (56). Impaired clearance of debris by microglia has  
323 been shown to increase with aging, causing cellular senescence and dysfunctional immune responses,  
324 and is implicated in the pathogenesis of other neurodegenerative diseases including multiple sclerosis  
325 and Alzheimer's (57, 58), suggesting that proper phagocytic function is an important aspect of neural  
326 homeostasis. With respect to our observation of deficient phagocytosis in the human Krabbe globoid  
327 cells, these findings further support the observation that impairment of microglial phagocytosis may  
328 contribute to Krabbe disease pathology.

329 Cellular function was also probed by stimulating all of the cell lines with LPS and measuring protein  
330 expression of the pro-inflammatory cytokine IL-6, which was selected as a readout because it is  
331 upregulated in Krabbe patients and the *twitcher* mouse and implicated in the cellular response to  
332 psychosine (59-62). While expression was not detected in the basal state, LPS stimulation resulted in  
333 the upregulation of IL-6 in all cultures, validating their differentiation into an LPS-responsive cell type.  
334 Interestingly, the Krabbe cultures had markedly reduced IL-6 expression compared to the healthy  
335 control and MLD cells. This result complements the finding that IL-6 deficiency exacerbated disease  
336 progression in the *twitcher* mouse, including increased number of PAS positive cells, reduced time to the  
337 twitching phenotype, and exaggerated gliotic response (63), and suggests that in the disease state IL-6  
338 may have a protective function (61) that is impeded by impaired microglial function. However, our  
339 result is not in agreement with the overall elevated IL-6 observed in Krabbe patient brain, but it is worth  
340 noting that this inflammatory cytokine arises from other cell sources in Krabbe disease, including  
341 astrocytes (20, 59, 60). A limitation of our current study was the examination of a single inflammatory  
342 cytokine, when multiple have been implicated in disease (61). Future studies can probe dysregulated  
343 expression of additional cytokines in the iPSC derived Krabbe microglia using a cytokine profiling panel,  
344 which might offer novel insights into the neuroimmune aspects of the disease. Together, our findings  
345 from both the phagocytosis assay and LPS-stimulation experiment suggest an impairment of normal  
346 microglial function of the Krabbe microglia cultures.

347 It is important to highlight that our finding of impaired phagocytosis of myelin and *E. coli* in globoid cells  
348 is in contrast with *in vitro* evidence in psychosine-induced globoid cells generated from mouse microglia,  
349 which show an increase of phagocytosis of fluorescently labeled beads (23). One possible explanation  
350 for this discrepancy is that globoid cells might resemble giant multinucleated cells, also called foreign

351 body giant cells, which form from the fusion of macrophages in response to inflammation following  
352 implants of biomaterials, prosthetics, or medical devices (30). These cells function to eliminate foreign  
353 material that is too large for individual macrophages (30, 64). Therefore, it is possible that  
354 multinucleated globoid cells are primed to phagocytose larger objects, such as beads, which may not be  
355 as physiologically relevant, rather than disease relevant substrates such as myelin or dead cells. In  
356 support of our speculation of the similarity between the cell types, data suggests that foreign body giant  
357 cells display an attenuated pro-inflammatory cytokine profile (65), which complements our finding of  
358 reduced IL-6 expression in the Krabbe derived globoid cell-containing cultures following LPS treatment.  
359 Future studies could examine differences in selectivity of substrate internalization in macrophages and  
360 fused globoid cells by comparing phagocytosis of myelin and conjugated beads in the described human  
361 iPSC globoid cell model.

362 Globoid cell formation appeared to be attenuated by changing the medium within a short window  
363 following passaging, suggesting that factors secreted from the cells are influencing the formation of  
364 multinucleated cells and that globoid cell formation can be modulated in the presence of the disease-  
365 causing *GALC* mutation. Of note, we were not able to attenuate globoid cell formation in an experiment  
366 where 1 nM or 10 nM recombinant human *GALC* protein was supplemented into the medium at the  
367 time of seeding (Supplementary Figure 3). This approach was limited however, as we are not able to  
368 determine the amount of functional *GALC* protein entering the cell or confirm its correct localization to  
369 the lysosome and effect on lysosomal glycosphingolipids. Considering previous work examining factors  
370 and downstream pathways influencing globoid cell formation in non-Krabbe derived cells, including the  
371 cytokines IL-4 and IL-13 (28, 54, 64), we hypothesize that 1) mutations in *GALC* render our iPSC-derived  
372 microglia-like cells into a primed state to fuse, and that the stress of passaging and seeding releases  
373 factors that trigger fusion, or 2) that the factors influencing cell fusion in our culture system are  
374 modulated to a greater degree following passaging in Krabbe-derived microglia than in the control or  
375 MLD cultures, leading to the increased fusion observed in the Krabbe patient cells. We note that these  
376 hypotheses do not have to be mutually exclusive, and further knowledge on the structure and function  
377 of the *GALC* protein under normal physiologic conditions (66, 67) will provide valuable insight towards  
378 addressing these questions. A limitation of our study is that we did not evaluate the effect of media  
379 change on the smaller fused cells that appeared in control and MLD microglia cultures, as our primary  
380 focus was on the globoid cells that formed in the Krabbe cultures due to the large qualitative window  
381 provided with our cellular imaging. Therefore, we do not know if the timing of media change would  
382 have a similar effect of reducing cell fusion in those cell cultures. Future studies can utilize an iPSC-  
383 approach to address if mechanisms leading to cell fusion are conserved across healthy and disease cell  
384 lines.

385 The overall limitations of our pilot investigation need to be considered when assessing its findings. First,  
386 we were limited to the use of a single Krabbe-derived iPSC line. Although we attempted to account for  
387 this limitation by utilizing two MLD-derived lines in addition to two healthy control lines for comparison,  
388 additional iPSC-derived microglia generated from multiple donors, including lines derived from the  
389 severe infantile onset and milder late onset forms, will better inform researchers on the role of microglia  
390 in disease progression and globoid cell formation. Next, we did not examine substrate accumulation in  
391 the Krabbe and MLD microglia and therefore do not know if the microglia-like cells used in the current  
392 study recapitulate lipid accumulation observed in the disease state. To this end, we were unable to  
393 determine if perturbed lipid levels affected globoid cell formation, which should be addressed in future

394 studies. Finally, we did not probe the factors that might be influencing globoid cell formation in our  
395 culture system. There are multiple proteins, both soluble and membrane-bound, that regulate the  
396 formation of giant multinucleated cells (68, 69). We speculate that iPSC-derived microglia will be a  
397 useful model to identify mediators of cell fusion relevant to Krabbe disease.

398 In conclusion, we demonstrate the feasibility of a human iPSC model to explore microglial function in  
399 Krabbe disease and MLD, which can be extended to examine other lysosomal storage disorders where  
400 microglia are of interest. The novel finding that iPSC microglia recapitulate the hallmark phenotype of  
401 globoid cell formation in Krabbe disease allowed us to probe the biology of these cells, whose functional  
402 significance in disease progression remains incompletely understood. Results from our study largely  
403 corroborate prior findings and offer additional insight into Krabbe disease biology in relevant human  
404 cells *in vitro*. As globoid cell formation has been observed in other neurologic diseases including  
405 amyotrophic lateral sclerosis (70), HIV encephalitis (71), and Alzheimer's (72), we postulate that iPSC  
406 microglia will serve as valuable models to explore commonalities that might be shared across multiple  
407 diseases.

408

409

410 **Figure Legends**

411

412

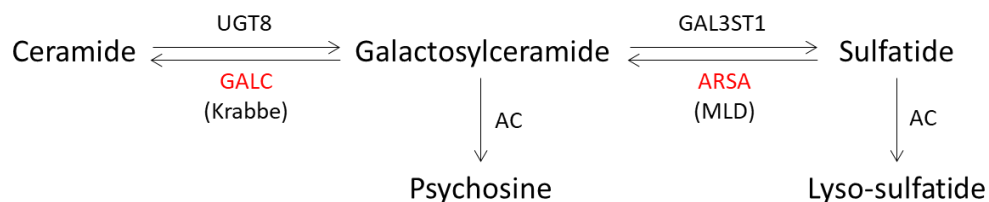

413

414 **Figure 1. Schematic of the biosynthesis of glycosphingolipids relevant to Krabbe disease and MLD**

415 A simplified version of the lipid biosynthesis pathway depicts the relationship between Krabbe disease  
416 and MLD. Krabbe disease is caused by deficiency in GALC leading to the impaired catabolism of  
417 galactosylceramide. Galactosylceramide is deacylated by acid ceramidase (AC) to produce psychosine,  
418 which is currently believed to accumulate to toxic levels in Krabbe disease. Just downstream of  
419 galactosylceramide is sulfatide, which is catabolized via the actions of arylsulfatase A (ARSA). Deficiency  
420 of this enzyme causes MLD and results in the accumulation of sulfatide and its deacylated form lyso-  
421 sulfatide.

422

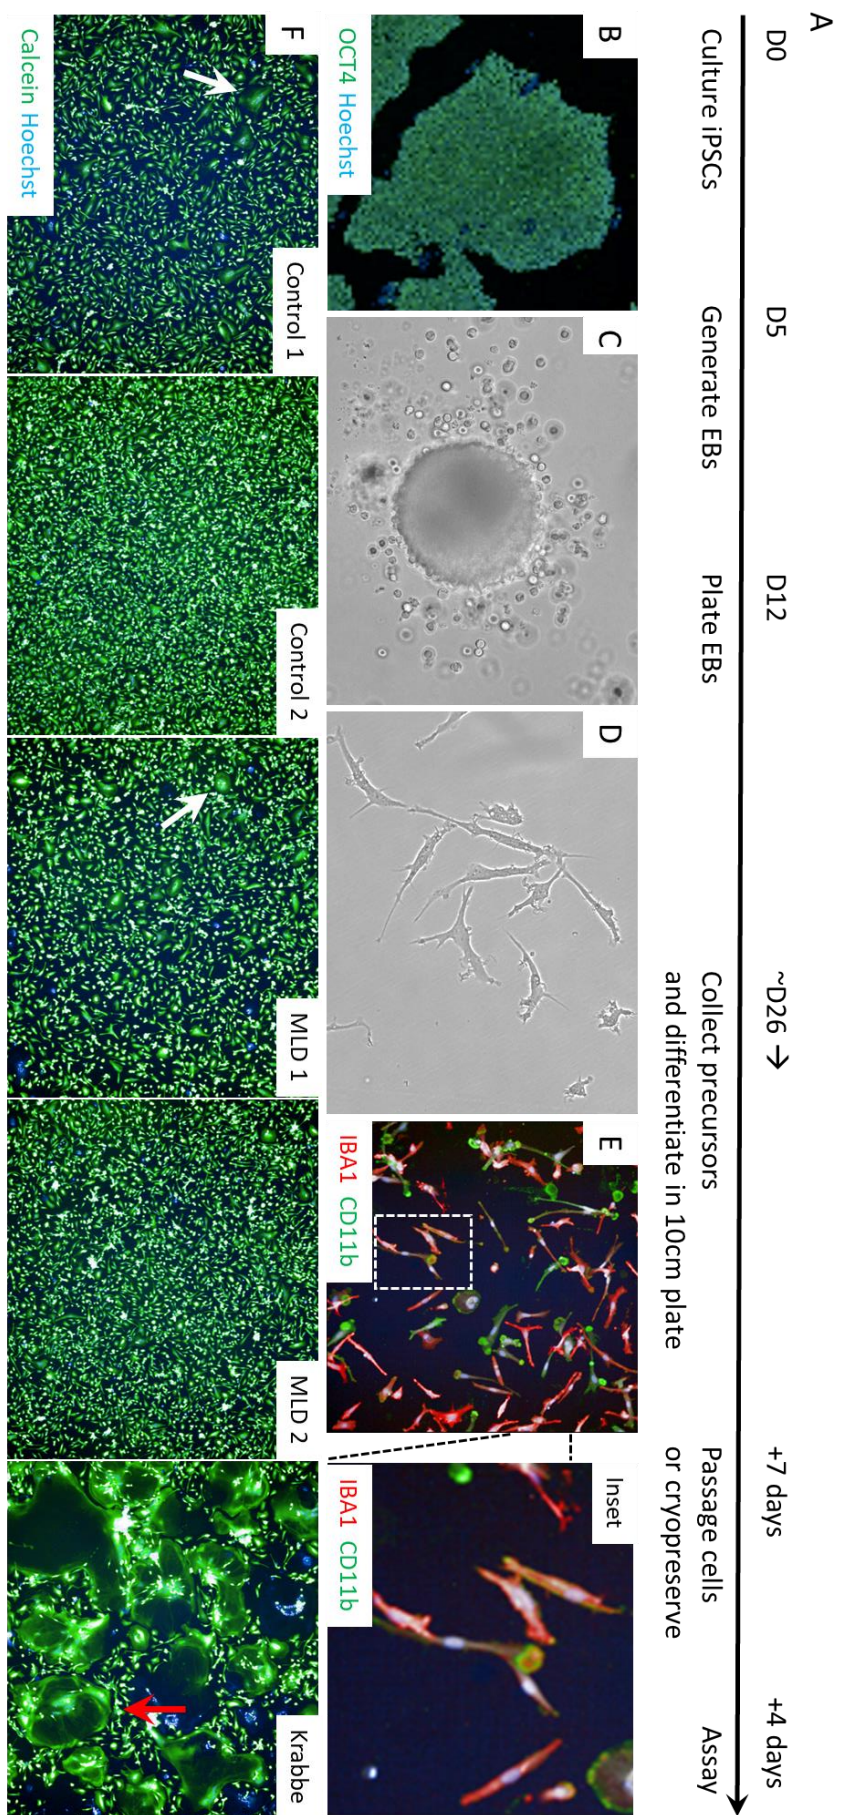



424

425 **Figure 2. Formation of multinucleated globoid cells in microglia derived from Krabbe iPSCs**

426 (A-E) Timeline and representative images of the differentiation of microglia-like cells. OCT4-expressing  
427 pluripotent iPSC colonies (B) were seeded into Aggrewell plates to generate EBs, which were cultured in  
428 medium facilitating the continuous shedding of primitive macrophage precursors (C). Precursors were  
429 collected from the medium and plated in defied medium for terminal differentiation into cultures of  
430 microglia-like cells (D) expressing IBA1 and CD11b (E). (F) After 7 days in microglia medium cells were  
431 lifted from the culture vessel and seeded into assay-format microwell plates. 4 days after passaging,  
432 microglia were imaged with the live cell fluorescent probe Calcein Green AM. Cell fusion was observed  
433 during this time in all cultures. Multinucleated cells formed in healthy control and MLD cultures (white  
434 arrows). The formation of multinucleated globoid cells was more robust in microglia cultures derived  
435 from the Krabbe donor (red arrow). Images in panels B-E were obtained with a 20x objective, and all  
436 images in panel F were obtained with a 5x objective.

437

438



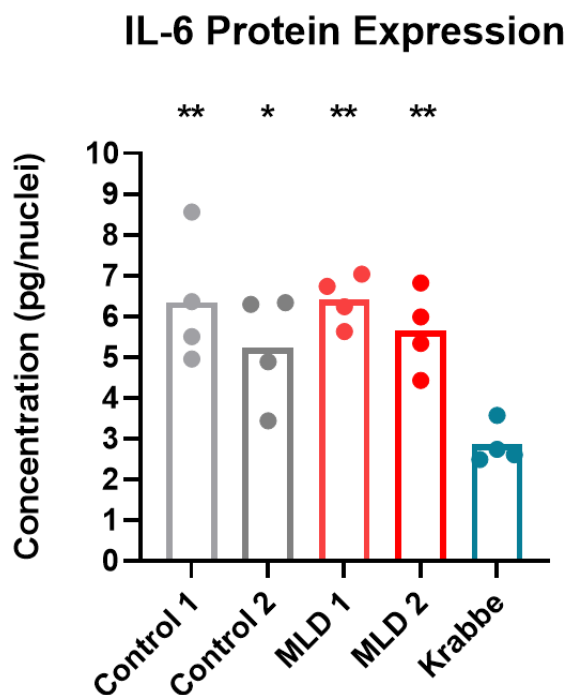

439

440 **Figure 3. Krabbe microglia have reduced production of IL-6 following LPS stimulation**

441 Microglia derived from the two healthy controls, 2 MLD donors, and a donor with Krabbe disease were  
442 passaged and seeded into assay-format 96 well plates, cultured for 96 hours, and then stimulated with  
443 50 ng/mL lipopolysaccharide (LPS) for 24 hours. IL-6 protein was measured in the supernatant of the  
444 cultures by alphaALISA and expression was normalized to the total viable nuclei count obtained via  
445 imaging of the assay plate. Globoid-cell containing Krabbe cultures displayed reduced LPS-stimulated IL-  
446 6 protein levels compared to the microglia generated from other subjects. Basal IL-6 was not detected  
447 in any of the cultures. Each dot represents the protein expression data obtained from a single well of a  
448 96 well plate. \*  $p < 0.05$ , \*\*  $p < 0.01$

449

450

Passage Krabbe microglia into 96 well plate → Culture for 96hr → Incubate with pHrodo-conjugated substrates for 2hr

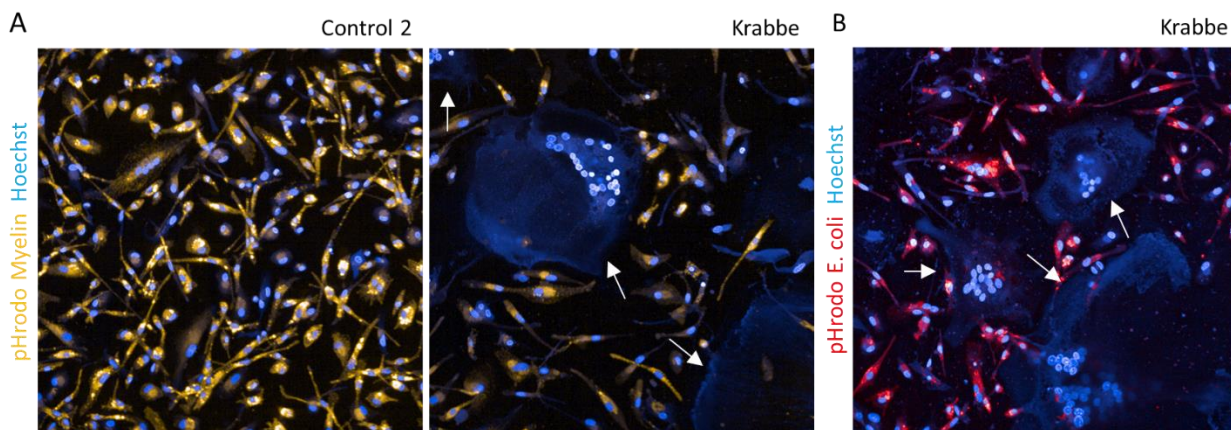

451

452 **Figure 4. Impaired phagocytosis of myelin and *E. coli* in multinucleated globoid cells**

453 Differentiated microglia derived from a healthy control and Krabbe donor were passaged and seeded  
454 into assay-format 96 well plates, cultured for 96 hours, and then incubated with pHrodo-conjugated  
455 substrates for 2 hours. Fluorescence of pHrodo-conjugated myelin debris (A) and *E. coli* (B), indicating  
456 its internalization and acidic-vesicle localization was absent in multinucleated globoid cells.  
457 Phagocytosis of substrates was apparent in individual microglia in the control and Krabbe cultures.  
458 White arrows denote globoid cells lacking fluorescence of conjugated substrate. Images were obtained  
459 with a 20x objective. pHrodo myelin is pseudo colored orange, and pHrodo *E. coli* is pseudo colored red.

Passage Krabbe microglia into 96 well plate → Replace media after indicated time → Fix cells at 96hr

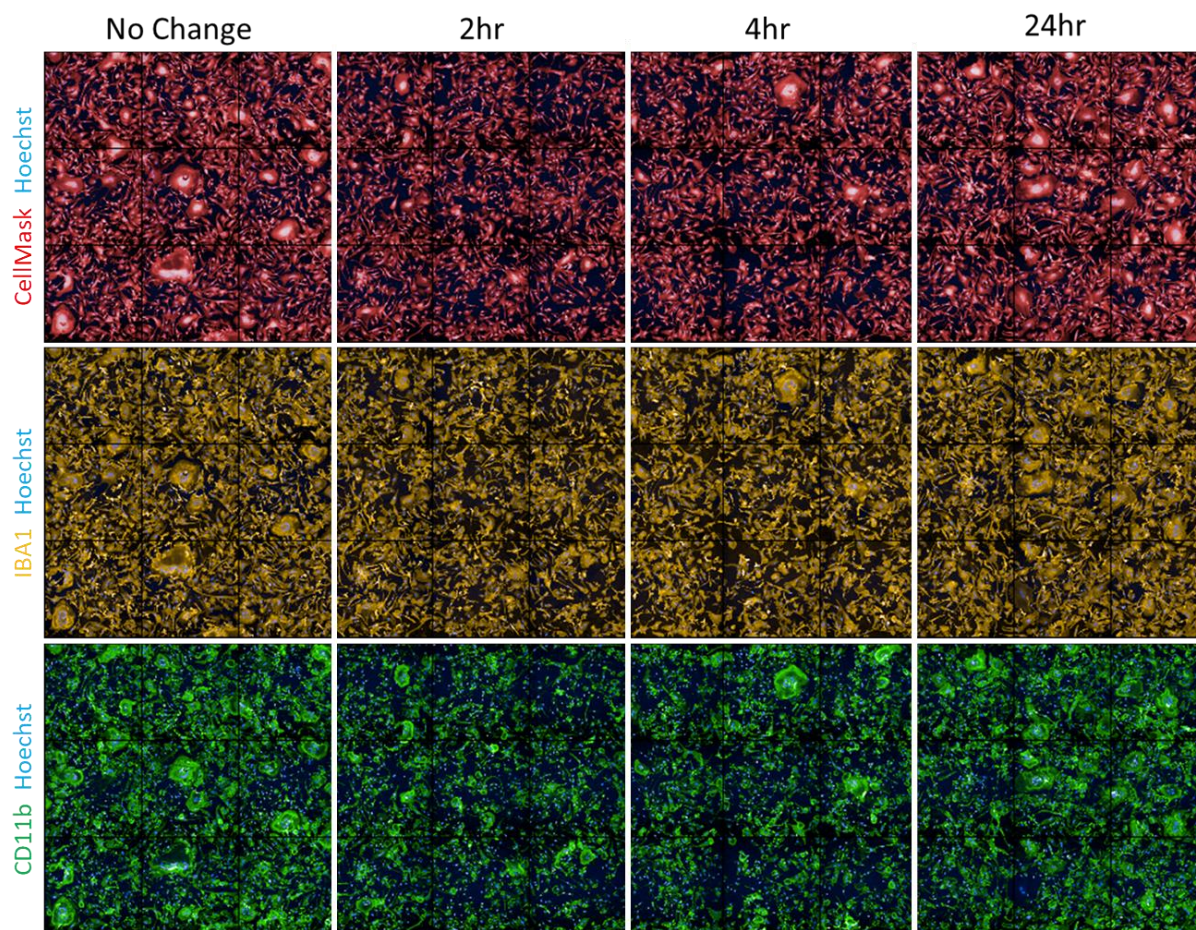

460

461 **Figure 5. Attenuation of globoid cell formation in Krabbe microglia by medium replacement following**  
462 **passaging**

463 Microglia from the Krabbe donor were passaged and seeded into a 96 well assay plate. Cells adhered to  
464 the tissue culture-treated plate within minutes following passaging. 100% of the medium was aspirated  
465 and replaced with fresh microglia medium at the indicated times. Cells were cultured for 96 hours prior  
466 to fixation. We observed that the formation of globoid cells was attenuated in wells where the medium  
467 was replaced 2 hours and 4 hours following seeding. Globoid cells expressed macrophage markers IBA1  
468 (orange) and CD11b (green). Images were obtained with a 20x objective and depict 9 adjacent fields.

469



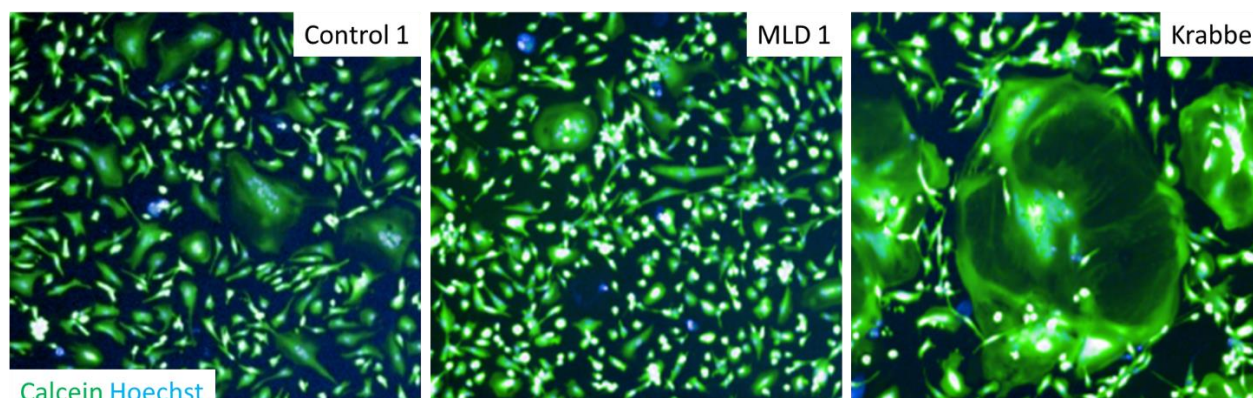

470

471 **Supplementary figure 1. Cropped view of multinucleated cells from Control 1, MLD1, and the Krabbe**  
472 **donor indicated in Figure 1F**

473 The image region highlighted in Figure 2F with white and red arrows has been cropped using the same  
474 dimensions to illustrate the difference in multinucleated cells that form in microglia cultures following  
475 passaging from the Control 1, MLD1, and Krabbe donor. These have been cropped from the same  
476 images shown in Figure 2F. Nuclei are shown in blue, live cells are shown in green.

477

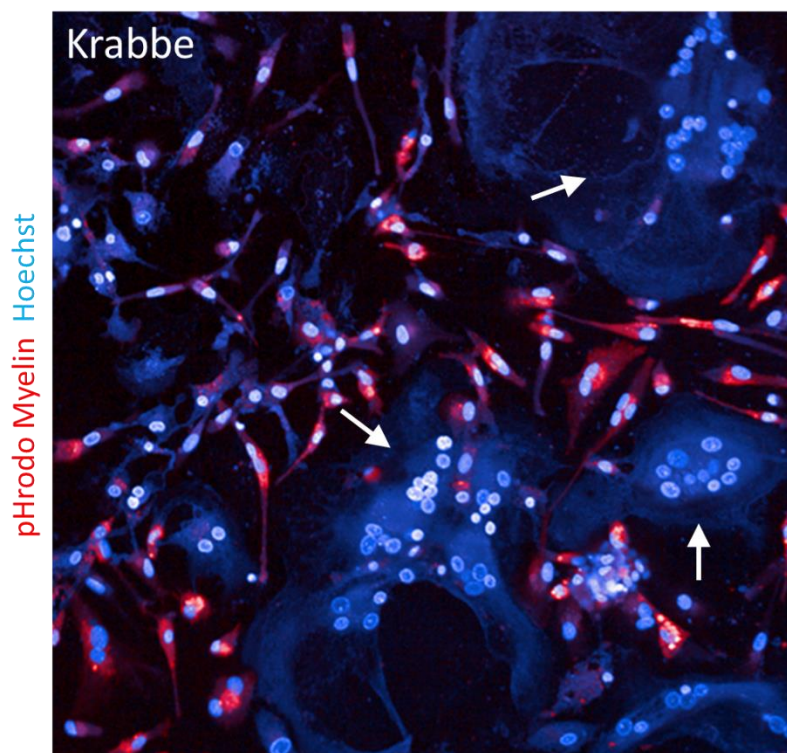

478

479

480 **Supplementary figure 2. Additional example of impaired phagocytosis of myelin debris in Krabbe**  
481 **multinucleated globoid cells**

482 An additional example from the experiment assessing phagocytosis in Krabbe microglia depicted in  
483 figure 4. Microglia from the Krabbe donor were passaged and seeded into a 96 well assay plate for 96  
484 hours. Cells were incubated with 20  $\mu\text{g}/\text{mL}$  pHrodo-conjugated myelin debris for 2 hours,  
485 counterstained with Hoechst, and then imaged live with a 20x objective. White arrows indicated  
486 multinucleated globoid cells that failed to internalize the conjugated substrate. pHrodo myelin is pseudo  
487 colored red.

488

489

Passage Krabbe microglia into 96 well plate in media +/- rhGALC → Fix cells at 96hr

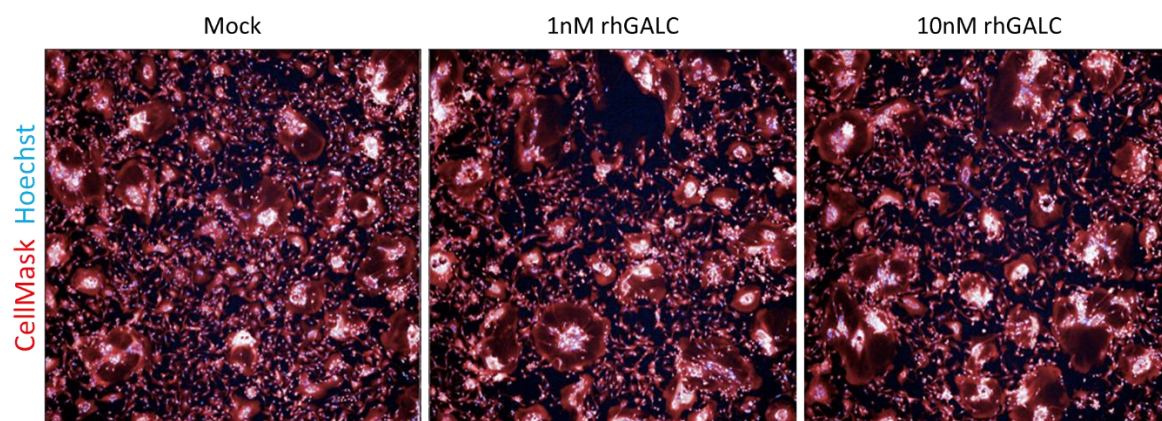

490

491

492 **Supplementary figure 3. Addition of rhGALC to the culture medium following passaging has no effect**  
493 **on globoid cell formation**

494 Microglia from the Krabbe donor were passaged and seeded into a 96 well assay plate in microglia  
495 medium supplemented with 1 nM and 10 nM rhGALC. Cells were cultured for 96 hours prior to fixation.  
496 We did not observe a difference in the formation of globoid cells when cultured in the presence of  
497 rhGALC protein. Images were obtained with a 5x objective.

498

499



## 500 **References**

- 501 1. Hannun YA, Obeid LM. Sphingolipids and their metabolism in physiology and disease. *Nat Rev*  
502 *Mol Cell Biol.* 2018;19(3):175-91.
- 503 2. Iwabuchi K, Nakayama H, Oizumi A, Suga Y, Ogawa H, Takamori K. Role of Ceramide from  
504 Glycosphingolipids and Its Metabolites in Immunological and Inflammatory Responses in Humans.  
505 *Mediumtors Inflamm.* 2015;2015:120748.
- 506 3. Lingwood CA. Glycosphingolipid functions. *Cold Spring Harb Perspect Biol.* 2011;3(7).
- 507 4. Schnaar RL, Kinoshita T. Glycosphingolipids. In: rd, Varki A, Cummings RD, Esko JD, Stanley P,  
508 Hart GW, et al., editors. *Essentials of Glycobiology.* Cold Spring Harbor (NY)2015. p. 125-35.
- 509 5. Sabourdy F, Astudillo L, Colacios C, Dubot P, Mrad M, Segui B, et al. Monogenic neurological  
510 disorders of sphingolipid metabolism. *Biochim Biophys Acta.* 2015;1851(8):1040-51.
- 511 6. Schulze H, Sandhoff K. Sphingolipids and lysosomal pathologies. *Biochim Biophys Acta.*  
512 2014;1841(5):799-810.
- 513 7. Kohlschutter A. Lysosomal leukodystrophies: Krabbe disease and metachromatic  
514 leukodystrophy. *Handb Clin Neurol.* 2013;113:1611-8.
- 515 8. Kobayashi T, Goto I, Yamanaka T, Suzuki Y, Nakano T, Suzuki K. Infantile and fetal globoid cell  
516 leukodystrophy: analysis of galactosylceramide and galactosylsphingosine. *Ann Neurol.* 1988;24(4):517-  
517 22.
- 518 9. Orsini JJ, Escolar ML, Wasserstein MP, Caggana M. Krabbe Disease. In: Adam MP, Ardinger HH,  
519 Pagon RA, Wallace SE, Bean LJH, Stephens K, et al., editors. *GeneReviews((R)).* Seattle (WA)1993.
- 520 10. Suzuki K. Globoid cell leukodystrophy (Krabbe's disease): update. *J Child Neurol.* 2003;18(9):595-  
521 603.
- 522 11. Zlotogora J, Chakraborty S, Knowlton RG, Wenger DA. Krabbe disease locus mapped to  
523 chromosome 14 by genetic linkage. *Am J Hum Genet.* 1990;47(1):37-44.
- 524 12. Suzuki K, Suzuki Y. Globoid cell leucodystrophy (Krabbe's disease): deficiency of  
525 galactocerebroside beta-galactosidase. *Proc Natl Acad Sci U S A.* 1970;66(2):302-9.
- 526 13. Wenger DA, Rafi MA, Luzi P, Datto J, Costantino-Ceccarini E. Krabbe disease: genetic aspects and  
527 progress toward therapy. *Mol Genet Metab.* 2000;70(1):1-9.
- 528 14. Svennerholm L, Vanier MT, Mansson JE. Krabbe disease: a galactosylsphingosine (psychosine)  
529 lipidosis. *J Lipid Res.* 1980;21(1):53-64.
- 530 15. White AB, Givogri MI, Lopez-Rosas A, Cao H, van Breemen R, Thinakaran G, et al. Psychosine  
531 accumulates in membrane microdomains in the brain of krabbe patients, disrupting the raft  
532 architecture. *J Neurosci.* 2009;29(19):6068-77.

- 533 16. Won JS, Kim J, Paintlia MK, Singh I, Singh AK. Role of endogenous psychosine accumulation in  
534 oligodendrocyte differentiation and survival: implication for Krabbe disease. *Brain Res.* 2013;1508:44-  
535 52.
- 536 17. Giri S, Khan M, Rattan R, Singh I, Singh AK. Krabbe disease: psychosine-mediated activation of  
537 phospholipase A2 in oligodendrocyte cell death. *J Lipid Res.* 2006;47(7):1478-92.
- 538 18. Castelvetti LC, Givogri MI, Zhu H, Smith B, Lopez-Rosas A, Qiu X, et al. Axonopathy is a  
539 compounding factor in the pathogenesis of Krabbe disease. *Acta Neuropathol.* 2011;122(1):35-48.
- 540 19. Smith BR, Santos MB, Marshall MS, Cantuti-Castelvetti L, Lopez-Rosas A, Li G, et al. Neuronal  
541 inclusions of alpha-synuclein contribute to the pathogenesis of Krabbe disease. *J Pathol.*  
542 2014;232(5):509-21.
- 543 20. O'Sullivan C, Dev KK. Galactosylsphingosine (psychosine)-induced demyelination is attenuated  
544 by sphingosine 1-phosphate signalling. *J Cell Sci.* 2015;128(21):3878-87.
- 545 21. Misslin C, Velasco-Estevez M, Albert M, O'Sullivan SA, Dev KK. Phospholipase A2 is involved in  
546 galactosylsphingosine-induced astrocyte toxicity, neuronal damage and demyelination. *PLoS One.*  
547 2017;12(11):e0187217.
- 548 22. Claycomb KI, Winokur PN, Johnson KM, Nicaise AM, Giampetruzzi AW, Sacino AV, et al. Aberrant  
549 production of tenascin-C in globoid cell leukodystrophy alters psychosine-induced microglial functions. *J*  
550 *Neuropathol Exp Neurol.* 2014;73(10):964-74.
- 551 23. Ijichi K, Brown GD, Moore CS, Lee JP, Winokur PN, Pagarigan R, et al. MMP-3 mediated  
552 psychosine-induced globoid cell formation: implications for leukodystrophy pathology. *Glia.*  
553 2013;61(5):765-77.
- 554 24. Suzuki K. Twenty five years of the "psychosine hypothesis": a personal perspective of its history  
555 and present status. *Neurochem Res.* 1998;23(3):251-9.
- 556 25. Suzuki K. Ultrastructural study of experimental globoid cells. *J Neuropathol Exp Neurol.*  
557 1971;30(1):145-6.
- 558 26. Itoh M, Hayashi M, Fujioka Y, Nagashima K, Morimatsu Y, Matsuyama H. Immunohistological  
559 study of globoid cell leukodystrophy. *Brain Dev.* 2002;24(5):284-90.
- 560 27. Borda JT, Alvarez X, Mohan M, Ratterree MS, Phillippi-Falkenstein K, Lackner AA, et al. Clinical  
561 and immunopathologic alterations in rhesus macaques affected with globoid cell leukodystrophy. *Am J*  
562 *Pathol.* 2008;172(1):98-111.
- 563 28. McInnes A, Rennick DM. Interleukin 4 induces cultured monocytes/macrophages to form giant  
564 multinucleated cells. *J Exp Med.* 1988;167(2):598-611.
- 565 29. McNally AK, Anderson JM. Multinucleated giant cell formation exhibits features of phagocytosis  
566 with participation of the endoplasmic reticulum. *Exp Mol Pathol.* 2005;79(2):126-35.

- 567 30. Brodbeck WG, Anderson JM. Giant cell formation and function. *Curr Opin Hematol.*  
568 2009;16(1):53-7.
- 569 31. Nicaise AM, Bongarzone ER, Crocker SJ. A microglial hypothesis of globoid cell leukodystrophy  
570 pathology. *J Neurosci Res.* 2016;94(11):1049-61.
- 571 32. Potter GB, Santos M, Davisson MT, Rowitch DH, Marks DL, Bongarzone ER, et al. Missense  
572 mutation in mouse GALC mimics human gene defect and offers new insights into Krabbe disease. *Hum*  
573 *Mol Genet.* 2013;22(17):3397-414.
- 574 33. Gomez-Ospina N. Arylsulfatase A Deficiency. In: Adam MP, Ardinger HH, Pagon RA, Wallace SE,  
575 Bean LJH, Stephens K, et al., editors. *GeneReviews*((R)). Seattle (WA)1993.
- 576 34. Biffi A, Lucchini G, Rovelli A, Sessa M. Metachromatic leukodystrophy: an overview of current  
577 and prospective treatments. *Bone Marrow Transplant.* 2008;42 Suppl 2:S2-6.
- 578 35. Gieselmann V, Krageloh-Mann I. Metachromatic leukodystrophy--an update. *Neuropediatrics.*  
579 2010;41(1):1-6.
- 580 36. Gieselmann V, Polten A, Kreysing J, von Figura K. Molecular genetics of metachromatic  
581 leukodystrophy. *J Inherit Metab Dis.* 1994;17(4):500-9.
- 582 37. Gieselmann V. Metachromatic leukodystrophy: genetics, pathogenesis and therapeutic options.  
583 *Acta Paediatr.* 2008;97(457):15-21.
- 584 38. Hess B, Saftig P, Hartmann D, Coenen R, Lullmann-Rauch R, Goebel HH, et al. Phenotype of  
585 arylsulfatase A-deficient mice: relationship to human metachromatic leukodystrophy. *Proc Natl Acad Sci*  
586 *U S A.* 1996;93(25):14821-6.
- 587 39. Bergner CG, van der Meer F, Winkler A, Wrzos C, Turkmen M, Valizada E, et al. Microglia damage  
588 precedes major myelin breakdown in X-linked adrenoleukodystrophy and metachromatic  
589 leukodystrophy. *Glia.* 2019;67(6):1196-209.
- 590 40. Biffi A, Montini E, Lorioli L, Cesani M, Fumagalli F, Plati T, et al. Lentiviral hematopoietic stem cell  
591 gene therapy benefits metachromatic leukodystrophy. *Science.* 2013;341(6148):1233158.
- 592 41. Biffi A, Capotondo A, Fasano S, del Carro U, Marchesini S, Azuma H, et al. Gene therapy of  
593 metachromatic leukodystrophy reverses neurological damage and deficits in mice. *J Clin Invest.*  
594 2006;116(11):3070-82.
- 595 42. Allewelt H, Taskindoust M, Troy J, Page K, Wood S, Parikh S, et al. Long-Term Functional  
596 Outcomes after Hematopoietic Stem Cell Transplant for Early Infantile Krabbe Disease. *Biol Blood*  
597 *Marrow Transplant.* 2018;24(11):2233-8.
- 598 43. Suzuki K. Biochemical pathogenesis of genetic leukodystrophies: comparison of metachromatic  
599 leukodystrophy and globoid cell leukodystrophy (Krabbe's disease). *Neuropediatrics.* 1984;15 Suppl:32-  
600 6.

- 601 44. Takahashi K, Tanabe K, Ohnuki M, Narita M, Ichisaka T, Tomoda K, et al. Induction of pluripotent  
602 stem cells from adult human fibroblasts by defined factors. *Cell*. 2007;131(5):861-72.
- 603 45. Mertens J, Marchetto MC, Bardy C, Gage FH. Evaluating cell reprogramming, differentiation and  
604 conversion technologies in neuroscience. *Nat Rev Neurosci*. 2016;17(7):424-37.
- 605 46. Abud EM, Ramirez RN, Martinez ES, Healy LM, Nguyen CHH, Newman SA, et al. iPSC-Derived  
606 Human Microglia-like Cells to Study Neurological Diseases. *Neuron*. 2017;94(2):278-93 e9.
- 607 47. Muffat J, Li Y, Yuan B, Mitalipova M, Omer A, Corcoran S, et al. Efficient derivation of microglia-  
608 like cells from human pluripotent stem cells. *Nat Med*. 2016;22(11):1358-67.
- 609 48. Douvaras P, Sun B, Wang M, Kruglikov I, Lalloo G, Zimmer M, et al. Directed Differentiation of  
610 Human Pluripotent Stem Cells to Microglia. *Stem Cell Reports*. 2017;8(6):1516-24.
- 611 49. Brownjohn PW, Smith J, Solanki R, Lohmann E, Houlden H, Hardy J, et al. Functional Studies of  
612 Missense TREM2 Mutations in Human Stem Cell-Derived Microglia. *Stem Cell Reports*. 2018;10(4):1294-  
613 307.
- 614 50. Haenseler W, Sansom SN, Buchrieser J, Newey SE, Moore CS, Nicholls FJ, et al. A Highly Efficient  
615 Human Pluripotent Stem Cell Microglia Model Displays a Neuronal-Co-culture-Specific Expression Profile  
616 and Inflammatory Response. *Stem Cell Reports*. 2017;8(6):1727-42.
- 617 51. van Wilgenburg B, Browne C, Vowles J, Cowley SA. Efficient, long term production of monocyte-  
618 derived macrophages from human pluripotent stem cells under partly-defined and fully-defined  
619 conditions. *PLoS One*. 2013;8(8):e71098.
- 620 52. Scott-Hewitt NJ, Folts CJ, Hogestyn JM, Piester G, Mayer-Proschel M, Noble MD. Heterozygote  
621 galactocerebrosidase (GALC) mutants have reduced remyelination and impaired myelin debris clearance  
622 following demyelinating injury. *Hum Mol Genet*. 2017;26(15):2825-37.
- 623 53. Tcw J, Wang M, Pimenova AA, Bowles KR, Hartley BJ, Lacin E, et al. An Efficient Platform for  
624 Astrocyte Differentiation from Human Induced Pluripotent Stem Cells. *Stem Cell Reports*. 2017;9(2):600-  
625 14.
- 626 54. Binder F, Hayakawa M, Choo MK, Sano Y, Park JM. Interleukin-4-induced beta-catenin regulates  
627 the conversion of macrophages to multinucleated giant cells. *Mol Immunol*. 2013;54(2):157-63.
- 628 55. Takata K, Kozaki T, Lee CZW, Thion MS, Otsuka M, Lim S, et al. Induced-Pluripotent-Stem-Cell-  
629 Derived Primitive Macrophages Provide a Platform for Modeling Tissue-Resident Macrophage  
630 Differentiation and Function. *Immunity*. 2017;47(1):183-98 e6.
- 631 56. Kondo Y, Adams JM, Vanier MT, Duncan ID. Macrophages counteract demyelination in a mouse  
632 model of globoid cell leukodystrophy. *J Neurosci*. 2011;31(10):3610-24.
- 633 57. Neumann H, Kotter MR, Franklin RJ. Debris clearance by microglia: an essential link between  
634 degeneration and regeneration. *Brain*. 2009;132(Pt 2):288-95.

- 635 58. Safaiyan S, Kannaiyan N, Snaidero N, Brioschi S, Biber K, Yona S, et al. Age-related myelin  
636 degradation burdens the clearance function of microglia during aging. *Nat Neurosci.* 2016;19(8):995-8.
- 637 59. LeVine SM, Brown DC. IL-6 and TNF $\alpha$  expression in brains of twitcher, quaking and normal  
638 mice. *J Neuroimmunol.* 1997;73(1-2):47-56.
- 639 60. Giri S, Jatana M, Rattan R, Won JS, Singh I, Singh AK. Galactosylsphingosine (psychosine)-induced  
640 expression of cytokine-mediated inducible nitric oxide synthases via AP-1 and C/EBP: implications for  
641 Krabbe disease. *FASEB J.* 2002;16(7):661-72.
- 642 61. Potter GB, Petryniak MA. Neuroimmune mechanisms in Krabbe's disease. *J Neurosci Res.*  
643 2016;94(11):1341-8.
- 644 62. Snook ER, Fisher-Perkins JM, Sansing HA, Lee KM, Alvarez X, MacLean AG, et al. Innate immune  
645 activation in the pathogenesis of a murine model of globoid cell leukodystrophy. *Am J Pathol.*  
646 2014;184(2):382-96.
- 647 63. Pedchenko TV, LeVine SM. IL-6 deficiency causes enhanced pathology in Twitcher (globoid cell  
648 leukodystrophy) mice. *Exp Neurol.* 1999;158(2):459-68.
- 649 64. Moreno JL, Mikhailenko I, Tondravi MM, Keegan AD. IL-4 promotes the formation of  
650 multinucleated giant cells from macrophage precursors by a STAT6-dependent, homotypic mechanism:  
651 contribution of E-cadherin. *J Leukoc Biol.* 2007;82(6):1542-53.
- 652 65. Dadsetan M, Jones JA, Hiltner A, Anderson JM. Surface chemistry mediates adhesive structure,  
653 cytoskeletal organization, and fusion of macrophages. *J Biomed Mater Res A.* 2004;71(3):439-48.
- 654 66. Deane JE, Graham SC, Kim NN, Stein PE, McNair R, Cachon-Gonzalez MB, et al. Insights into  
655 Krabbe disease from structures of galactocerebrosidase. *Proc Natl Acad Sci U S A.* 2011;108(37):15169-  
656 73.
- 657 67. Marques AR, Willems LI, Herrera Moro D, Florea BI, Scheij S, Ottenhoff R, et al. A Specific  
658 Activity-Based Probe to Monitor Family GH59 Galactosylceramidase, the Enzyme Deficient in Krabbe  
659 Disease. *Chembiochem.* 2017;18(4):402-12.
- 660 68. Vignery A. Macrophage fusion: are somatic and cancer cells possible partners? *Trends Cell Biol.*  
661 2005;15(4):188-93.
- 662 69. Vignery A. Macrophage fusion: the making of osteoclasts and giant cells. *J Exp Med.*  
663 2005;202(3):337-40.
- 664 70. Fendrick SE, Xue QS, Streit WJ. Formation of multinucleated giant cells and microglial  
665 degeneration in rats expressing a mutant Cu/Zn superoxide dismutase gene. *J Neuroinflammation.*  
666 2007;4:9.
- 667 71. Budka H. Multinucleated giant cells in brain: a hallmark of the acquired immune deficiency  
668 syndrome (AIDS). *Acta Neuropathol.* 1986;69(3-4):253-8.

669 72. Ferrer I, Boada Rovira M, Sanchez Guerra ML, Rey MJ, Costa-Jussa F. Neuropathology and  
670 pathogenesis of encephalitis following amyloid-beta immunization in Alzheimer's disease. *Brain Pathol.*  
671 2004;14(1):11-20.

672

673
